# Supplementary material for: Nano-ceria priming ameliorates heavy metal nanoparticle toxicity in tomato
Source: Research Square preprint supplement (doi:10.21203/rs.3.rs-7262389/v1), 2025-08-29
Supplement: Supplementary file 1 [file e5f3cc4ea2eb1ac0ba7620ff.docx]

| **Sl No.** | **RAPD primer** | **Sequence** |
| --- | --- | --- |
| 1 | **OPA-04** | **AATCGGGCTG** |
| 2 | OPA-07 | GAAACGGGTG |
| 3 | **OPA-09** | **GGGTAACGCC** |
| 4 | **OPA-10** | **GTGATCGCAG** |
| 5 | OPA-18 | AGGTGACCGT |
| 6 | **OPB-02** | **TGATCCCTGG** |
| 7 | **OPB-07** | **GGTGACGCAG** |
| 8 | OPB-09 | TGGGGGACTC |
| 9 | OPC-02 | GTGAGGCGTC |
| 10 | **OPC-05** | **GATGACCGCC** |
| 11 | **OPC-10** | **TGTCTGGGTG** |
| 12 | **OPD-02** | **GGACCCAACC** |
| 13 | OPD-03 | GTCGCCGTCA |
| 14 | OPD-05 | TGAGCGGACA |
| 15 | **OPD-13** | **GGGGTGACGA** |
| 16 | OPE-03 | CCAGATGCAC |
| 17 | **OPE-08** | **TCACCACGGT** |
| 18 | **OPE-11** | **GAGTCTCAGG** |
| 19 | OPE-16 | GGTGACTGTG |
| 20 | **OPF-13** | **GGCTGCAGAA** |
| 21 | OPF-20 | GGTCTAGAGG |
| 22 | OPG-02 | GGCACTGAGG |
| 23 | **OPG-10** | **AGGGCCGTCT** |
| 24 | **OPG-13** | **CTCTCCGCCA** |
| 25 | OPH-04 | GGAAGTCGCC |

Supplementary table 1: RAPD primers used for genomic template stability study. Primers which showed reproducible bands are in bold.
